# Supplementary material for: An atlas of endohedral Sc2S cluster fullerenes
Source: Royal Society of Chemistry journal article supplement (doi:10.1039/c6cp07370k), 2016-11-22
Supplement: c6cp07370k1.pdf [file c6cp07370k1.pdf]

## Supplementary Information

### An atlas of endohedral Sc<sub>2</sub>S cluster fullerenes

Li-Hua Gan\*, Rui Wu, Jian-Lei Tian and Patrick W. Fowler\*

School of Chemistry and Chemical Engineering, Southwest University, Chongqing, China 400715

Department of Chemistry, Sheffield University, Sheffield, S3 7HF, UK

E-mail: ganlh@swu.edu.cn; P.W.Fowler@sheffield.ac.uk

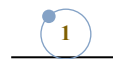

S1: Isomer counts for sets of classical (C<sub>n</sub>) and non-classical (C<sub>n</sub><sup>1h</sup>) cages studied here.

Page 2

S2: Optimized cartesian coordinates (Å) for the favoured isomer Sc<sub>2</sub>S@C<sub>n</sub> for each n = 70 to 84.

Page 3

S3 Relative energies of C<sub>4</sub>- n (energy in kcal/mol) calculated at the B3LYP/3-21G level.

Page 18

S1 Isomer counts for sets of classical ( $C_n$ ) and non-classical ( $C_n^{1h}$ ) cages studied here.

| $C_n$    | $N_{55}$ |     |      |      | Total | $C_n^{1h}$    | $N_{55}$ |     |      |       | Total |
|----------|----------|-----|------|------|-------|---------------|----------|-----|------|-------|-------|
|          | 0        | 1   | 2    | 3    |       |               | 0        | 1   | 2    | 3     |       |
| $C_{70}$ | 1        | 1   | 20   | 124  | 146   | $C_{70}^{1h}$ | 0        | 0   | 8    | 143   | 151   |
| $C_{72}$ | 1        | 3   | 38   | 227  | 269   | $C_{72}^{1h}$ | 0        | 0   | 33   | 459   | 492   |
| $C_{74}$ | 1        | 3   | 72   | 400  | 476   | $C_{74}^{1h}$ | 0        | 4   | 86   | 1267  | 1357  |
| $C_{76}$ | 2        | 12  | 140  | 653  | 807   | $C_{76}^{1h}$ | 0        | 7   | 242  | 2992  | 3241  |
| $C_{78}$ | 5        | 18  | 240  | 1088 | 1351  | $C_{78}^{1h}$ | 1        | 24  | 602  | 6729  | 7356  |
| $C_{80}$ | 7        | 36  | 432  | 1714 | 2189  | $C_{80}^{1h}$ | 1        | 71  | 1438 | 13957 | 15467 |
| $C_{82}$ | 9        | 66  | 669  | 2704 | 3448  | $C_{82}^{1h}$ | 6        | 177 | 3165 | 27088 | 30436 |
| $C_{84}$ | 24       | 110 | 1059 | 4039 | 5232  |               |          |     |      |       |       |

---

S2 Optimized cartesian coordinates (Å) for the favoured isomer Sc<sub>2</sub>S@C<sub>n</sub> for each n = 70 to 84

1. Sc<sub>2</sub>S@C70-7892

|   |             |             |             |
|---|-------------|-------------|-------------|
| C | 2.03075400  | -2.77665800 | 1.70856500  |
| C | 3.23295000  | -2.18363800 | 1.21321300  |
| C | 3.47443600  | -0.78953800 | 1.56302000  |
| C | 3.92606500  | -0.10292900 | 0.35425500  |
| C | 3.52532900  | 1.25943500  | 0.07400900  |
| C | 3.06291300  | 1.61206500  | -1.29350800 |
| C | 2.26373600  | 2.77620600  | -1.42568600 |
| C | 1.20277000  | 2.86441100  | -2.41090500 |
| C | 0.10223200  | 3.61213800  | -1.84593400 |
| C | -1.21178300 | 3.20118800  | -2.09259600 |
| C | -2.17122000 | 3.15947800  | -1.00800300 |
| C | -3.02514700 | 2.02040900  | -1.18726600 |
| C | -3.51192700 | 1.29481300  | -0.07326600 |
| C | -3.92578700 | -0.06331800 | -0.35399200 |
| C | -3.97652500 | -1.03623900 | 0.70430300  |
| C | -3.56558000 | -2.32511800 | 0.19092800  |
| C | -2.57585300 | -2.87616700 | 1.11369700  |
| C | -1.36533600 | -3.48630000 | 0.59989200  |
| C | -0.18454200 | -3.45187200 | 1.41478800  |
| C | 1.13451300  | -3.50666500 | 0.82981100  |
| C | 1.24535300  | -2.14660800 | 2.73033700  |
| C | -0.10986700 | -2.60796700 | 2.58152300  |
| C | -1.21266900 | -1.77769900 | 2.95664200  |
| C | -2.44507300 | -1.92741600 | 2.21906600  |
| C | -3.28283400 | -0.77620200 | 1.94212700  |
| C | -2.84509300 | 0.55629100  | 2.28199600  |
| C | -3.04621200 | 1.64207200  | 1.29425500  |
| C | -2.23563400 | 2.79819200  | 1.42701800  |
| C | -1.79710800 | 3.55190300  | 0.27460200  |
| C | -0.44793200 | 4.03502300  | 0.51887100  |
| C | 0.48851300  | 4.03047000  | -0.51694900 |
| C | 1.83280900  | 3.53378800  | -0.27297900 |
| C | 2.20294700  | 3.13696300  | 1.00945100  |
| C | 3.04546200  | 1.98945500  | 1.18823200  |
| C | 2.61316300  | 1.31384200  | 2.42120500  |
| C | 2.67130400  | -0.09457900 | 2.55640400  |
| C | 1.53762200  | -0.80634700 | 3.18256500  |
| C | 0.43971700  | -0.04576500 | 3.66287300  |
| C | -0.93246300 | -0.50833000 | 3.51081900  |
| C | -1.76751900 | 0.63924700  | 3.21161600  |
| C | -0.92726900 | 1.80183700  | 3.26210400  |

|    |             |             |             |
|----|-------------|-------------|-------------|
| C  | -1.17392200 | 2.87546600  | 2.41233000  |
| C  | -0.06587000 | 3.61246000  | 1.84776600  |
| C  | 1.24394700  | 3.18793400  | 2.09406500  |
| C  | 1.50403300  | 2.05940000  | 2.95332800  |
| C  | 0.42910300  | 1.38203100  | 3.53961200  |
| C  | -1.48312400 | 2.07570000  | -2.95231500 |
| C  | -2.59972400 | 1.34105500  | -2.42048100 |
| C  | -2.67195400 | -0.06664200 | -2.55639800 |
| C  | -3.48161800 | -0.75381600 | -1.56297600 |
| C  | -3.25510400 | -2.15062900 | -1.21401100 |
| C  | -2.05908400 | -2.75551500 | -1.70988800 |
| C  | -1.17017800 | -3.49429700 | -0.83094100 |
| C  | 0.14944400  | -3.45277300 | -1.41600700 |
| C  | 1.32951300  | -3.49921700 | -0.60100800 |
| C  | 2.54575900  | -2.90043100 | -1.11425100 |
| C  | 3.54141200  | -2.36036800 | -0.19169800 |
| C  | 3.96627000  | -1.07588200 | -0.70467100 |
| C  | 3.27495300  | -0.80825400 | -1.94232900 |
| C  | 2.85066800  | 0.52868400  | -2.28173600 |
| C  | 1.77389700  | 0.62276400  | -3.21131100 |
| C  | 0.94540300  | 1.79376800  | -3.26125600 |
| C  | -0.41516500 | 1.38776400  | -3.53892600 |
| C  | -0.44023500 | -0.03982100 | -3.66302300 |
| C  | -1.54581900 | -0.78962200 | -3.18323700 |
| C  | -1.26721300 | -2.13299400 | -2.73144100 |
| C  | 0.08330000  | -2.60801800 | -2.58267000 |
| C  | 1.19437900  | -1.78855600 | -2.95727200 |
| C  | 2.42495400  | -1.95047700 | -2.21932400 |
| C  | 0.92715400  | -0.51620300 | -3.51103000 |
| Sc | 1.78426700  | -0.97101500 | -0.07457100 |
| Sc | -1.79244300 | -0.95726300 | 0.07520000  |
| S  | 0.00158300  | 0.55709800  | -0.00307900 |

2. Sc2S@C72-10528

|   |             |             |             |
|---|-------------|-------------|-------------|
| C | 4.06035100  | -0.51225100 | -1.19375000 |
| C | 3.18597700  | -0.90134800 | -2.24870700 |
| C | 2.40105900  | 0.06814800  | -2.96694300 |
| C | 1.22249700  | -0.60332900 | -3.44073700 |
| C | -0.00015500 | 0.10255300  | -3.63982900 |
| C | -1.22285400 | -0.60322900 | -3.44062800 |
| C | -2.40132200 | 0.06834400  | -2.96674300 |
| C | -3.18630900 | -0.90109900 | -2.24848200 |
| C | -4.06054800 | -0.51191600 | -1.19343700 |
| C | -4.19792200 | -1.40925800 | -0.05812700 |
| C | -4.10972300 | -0.59732500 | 1.13279900  |

---

|   |             |             |             |
|---|-------------|-------------|-------------|
| C | -3.20490800 | -1.21055000 | 2.06568200  |
| C | -2.34572300 | -0.40766700 | 2.89604500  |
| C | -1.17220700 | -1.06151600 | 3.36756700  |
| C | 0.00014100  | -0.31043100 | 3.70754200  |
| C | 1.17239600  | -1.06161700 | 3.36747300  |
| C | 2.34593400  | -0.40787200 | 2.89585400  |
| C | 3.20502600  | -1.21083400 | 2.06545800  |
| C | 4.10984100  | -0.59767400 | 1.13250100  |
| C | 4.19777800  | -1.40960400 | -0.05846400 |
| C | 3.90231800  | 0.84691000  | -0.68530200 |
| C | 3.91891400  | 0.77670300  | 0.76772000  |
| C | 3.09200100  | 1.64045300  | 1.57344900  |
| C | 2.33592200  | 1.05757600  | 2.70591000  |
| C | 1.18351400  | 1.76329300  | 3.13800000  |
| C | 0.00019300  | 1.06980800  | 3.59456800  |
| C | -1.18310600 | 1.76339500  | 3.13810300  |
| C | -2.33560700 | 1.05777400  | 2.70610600  |
| C | -3.09171200 | 1.64071300  | 1.57370200  |
| C | -3.91870900 | 0.77701800  | 0.76801600  |
| C | -3.90228700 | 0.84722900  | -0.68499300 |
| C | -3.10621800 | 1.85100900  | -1.36797200 |
| C | -2.35722600 | 1.45529900  | -2.57358200 |
| C | -1.17841400 | 2.17563000  | -2.90392400 |
| C | -0.00008300 | 1.50132600  | -3.40181500 |
| C | 1.17834800  | 2.17552900  | -2.90402000 |
| C | 2.35712500  | 1.45509600  | -2.57377000 |
| C | 3.10625900  | 1.85074300  | -1.36822200 |
| C | 2.60349900  | 2.89264100  | -0.55183400 |
| C | 2.59326300  | 2.78762000  | 0.90445600  |
| C | 1.41883100  | 3.47046900  | 1.38087200  |
| C | 0.72850200  | 2.95699800  | 2.47247700  |
| C | -0.72804800 | 2.95706300  | 2.47254100  |
| C | -1.41842000 | 3.47059600  | 1.38099200  |
| C | -2.59294500 | 2.78783700  | 0.90467000  |
| C | -2.60330100 | 2.89285900  | -0.55161800 |
| C | -1.42475400 | 3.63768400  | -0.94006000 |
| C | -0.72477400 | 3.27359200  | -2.09155800 |
| C | 0.72487200  | 3.27352800  | -2.09161800 |
| C | 1.42498600  | 3.63756500  | -0.94018000 |
| C | 0.69905300  | 4.01005900  | 0.24622000  |
| C | -0.69869100 | 4.01012100  | 0.24627900  |
| C | 2.42310100  | -2.14078300 | -2.16692000 |
| C | 1.22423200  | -1.95501400 | -2.94829700 |
| C | -0.00023000 | -2.60186400 | -2.60299600 |

---

|    |             |             |             |
|----|-------------|-------------|-------------|
| C  | -1.22466800 | -1.95491200 | -2.94818700 |
| C  | -2.42352000 | -2.14060500 | -2.16673900 |
| C  | -2.41175100 | -2.93348500 | -0.95665700 |
| C  | -3.30736000 | -2.55297200 | 0.11900600  |
| C  | -2.74078000 | -2.44822300 | 1.46828700  |
| C  | -1.44643600 | -2.98600000 | 1.80926300  |
| C  | -0.72485800 | -2.33154300 | 2.84132500  |
| C  | 0.72488800  | -2.33160400 | 2.84126300  |
| C  | 1.44632400  | -2.98612000 | 1.80914400  |
| C  | 2.74068700  | -2.44844400 | 1.46807000  |
| C  | 3.30709900  | -2.55320300 | 0.11873400  |
| C  | 2.41135600  | -2.93363200 | -0.95684300 |
| C  | 1.16231700  | -3.55169700 | -0.60457000 |
| C  | -0.00021800 | -3.44158200 | -1.43889500 |
| C  | -1.16269700 | -3.55159600 | -0.60447400 |
| C  | -0.71542600 | -3.64086700 | 0.76589600  |
| C  | 0.71516700  | -3.64092900 | 0.76583600  |
| Sc | -2.10014900 | -0.60986400 | -0.02999600 |
| Sc | 2.10019700  | -0.60980300 | -0.02979300 |
| S  | -0.00001000 | 0.41559500  | 0.02937200  |

### 3. Sc2S@C74-13333

|   |             |             |             |
|---|-------------|-------------|-------------|
| C | -4.16909100 | 1.39102200  | -0.12510100 |
| C | -3.51225900 | 1.96438900  | 0.98992300  |
| C | -2.46844100 | 2.95063600  | 0.82533100  |
| C | -1.61380200 | 2.86297800  | 1.97263300  |
| C | -0.23751100 | 3.23078900  | 1.90512300  |
| C | 0.68105200  | 2.53785100  | 2.75334800  |
| C | 2.04321800  | 2.34024700  | 2.36292900  |
| C | 2.46672700  | 1.05293600  | 2.87183900  |
| C | 3.45015900  | 0.25656600  | 2.19567600  |
| C | 3.21965000  | -1.17542600 | 2.17867200  |
| C | 3.51251700  | -1.96409400 | 0.99031800  |
| C | 2.46850600  | -2.95023600 | 0.82605200  |
| C | 1.94130200  | -3.27160500 | -0.46964700 |
| C | 0.59843900  | -3.73386600 | -0.50494500 |
| C | -0.25408900 | -3.45750400 | -1.63018500 |
| C | -1.60786100 | -3.29200400 | -1.17625700 |
| C | -2.48277100 | -2.36314900 | -1.80499400 |
| C | -3.56473400 | -1.88151900 | -0.97852300 |
| C | -4.21089200 | -0.63576400 | -1.26486400 |
| C | -4.58945400 | 0.00481300  | -0.03015700 |
| C | -3.53784600 | 1.59167700  | -1.43235300 |
| C | -3.55329700 | 0.31559300  | -2.12257400 |
| C | -2.46435300 | -0.09915900 | -2.96571400 |

---

|   |             |             |             |
|---|-------------|-------------|-------------|
| C | -1.96896500 | -1.48903900 | -2.86970700 |
| C | -0.64492200 | -1.72859800 | -3.31986100 |
| C | 0.20584600  | -2.70283400 | -2.69765700 |
| C | 1.57817600  | -2.23166400 | -2.70397000 |
| C | 2.45620900  | -2.53164600 | -1.63135000 |
| C | 3.53792100  | -1.59216600 | -1.43216100 |
| C | 4.16932900  | -1.39115200 | -0.12500400 |
| C | 4.58949800  | -0.00478300 | -0.03048000 |
| C | 4.14730200  | 0.84970900  | 1.06794700  |
| C | 3.56177400  | 2.05078700  | 0.45999000  |
| C | 2.51099700  | 2.80821200  | 1.09752300  |
| C | 1.61152400  | 3.50876400  | 0.25067700  |
| C | 0.24079100  | 3.72759800  | 0.65975000  |
| C | -0.59849900 | 3.73383300  | -0.50606700 |
| C | -1.94134700 | 3.27157100  | -0.47051400 |
| C | -2.45629600 | 2.53121100  | -1.63194200 |
| C | -1.57835900 | 2.23092700  | -2.70455700 |
| C | -1.57976500 | 0.94131400  | -3.35308200 |
| C | -0.21890900 | 0.65381200  | -3.74271500 |
| C | 0.21865400  | -0.65486800 | -3.74252800 |
| C | 1.57952000  | -0.94224200 | -3.35290300 |
| C | 2.46413400  | 0.09834500  | -2.96588900 |
| C | 3.55312800  | -0.31622400 | -2.12272300 |
| C | 4.21062100  | 0.63537000  | -1.26527400 |
| C | 3.56435800  | 1.88111500  | -0.97928300 |
| C | 2.48261800  | 2.36272300  | -1.80594000 |
| C | 1.60776600  | 3.29175500  | -1.17741800 |
| C | 0.25396200  | 3.45715200  | -1.63131300 |
| C | -0.20603000 | 2.70211400  | -2.69850400 |
| C | 0.64469700  | 1.72767400  | -3.32047700 |
| C | 1.96876800  | 1.48824700  | -2.87033700 |
| C | -3.21944900 | 1.17618700  | 2.17854100  |
| C | -2.05299600 | 1.75806800  | 2.79298800  |
| C | -1.10241100 | 0.95190100  | 3.48031100  |
| C | 0.25768100  | 1.39154800  | 3.50578100  |
| C | 1.34581200  | 0.45973900  | 3.54439800  |
| C | 1.10263500  | -0.95071500 | 3.48051200  |
| C | 2.05317400  | -1.75709500 | 2.79334400  |
| C | 1.61392400  | -2.86221700 | 1.97338700  |
| C | 0.23762500  | -3.23008600 | 1.90609100  |
| C | -0.24076800 | -3.72730800 | 0.66093800  |
| C | -1.61153100 | -3.50863400 | 0.25189100  |
| C | -2.51099400 | -2.80782900 | 1.09857300  |
| C | -3.56191800 | -2.05070200 | 0.46086400  |

|    |             |             |             |
|----|-------------|-------------|-------------|
| C  | -4.14729600 | -0.84935100 | 1.06851400  |
| C  | -3.44994400 | -0.25577900 | 2.19591200  |
| C  | -2.46652500 | -1.05194600 | 2.87231800  |
| C  | -1.34558000 | -0.45854200 | 3.54460700  |
| C  | -0.25744500 | -1.39036500 | 3.50620900  |
| C  | -0.68087000 | -2.53688700 | 2.75415300  |
| C  | -2.04307000 | -2.33941800 | 2.36375800  |
| S  | 0.00002000  | 0.00050800  | -0.00443800 |
| Sc | -2.33636300 | -0.00035900 | -0.02477300 |
| Sc | 2.33642600  | -0.00081500 | -0.02437500 |

4. Sc2S@C76-19151

|   |             |             |             |
|---|-------------|-------------|-------------|
| C | -1.42468600 | 2.46678100  | 2.85900500  |
| C | -0.74049200 | 1.46012000  | 3.60275400  |
| C | 0.73765800  | 1.46404500  | 3.60180800  |
| C | 1.42168900  | 0.22338900  | 3.77129000  |
| C | 2.60171500  | -0.07845100 | 3.02627200  |
| C | 2.59331500  | -1.50087700 | 2.68359800  |
| C | 3.07810400  | -1.96782100 | 1.44480900  |
| C | 2.34601500  | -3.04320300 | 0.75908500  |
| C | 2.39846200  | -3.07319400 | -0.68322600 |
| C | 1.22633700  | -3.39880000 | -1.44200000 |
| C | 1.22356000  | -2.60470900 | -2.64989000 |
| C | 0.00331700  | -2.09641300 | -3.19107100 |
| C | -0.00062800 | -0.72637100 | -3.74940200 |
| C | -1.22130900 | 0.01453900  | -3.71708200 |
| C | -1.22491400 | 1.42654700  | -3.40490200 |
| C | -2.39713200 | 1.72202000  | -2.63356900 |
| C | -2.34604000 | 2.70539600  | -1.57825500 |
| C | -3.07973500 | 2.41381600  | -0.33757300 |
| C | -2.59609200 | 2.94348200  | 0.87646300  |
| C | -2.60454700 | 2.16267400  | 2.11358600  |
| C | -0.70253800 | 3.48758100  | 2.12607400  |
| C | -1.42585700 | 3.78045700  | 0.91501100  |
| C | -0.73036900 | 4.07093100  | -0.26068900 |
| C | -1.18522300 | 3.52178900  | -1.51213300 |
| C | -0.00997100 | 3.21917000  | -2.29862000 |
| C | -0.00772300 | 2.14149800  | -3.21370500 |
| C | 1.21291800  | 1.43304800  | -3.40686600 |
| C | 1.21611100  | 0.02080900  | -3.71879600 |
| C | 2.45001700  | -0.52711600 | -3.20867300 |
| C | 2.45520800  | -1.85260900 | -2.67078900 |
| C | 3.20606800  | -2.15595600 | -1.47556500 |
| C | 3.97716600  | -1.12467700 | -0.82230000 |
| C | 3.80238000  | -1.00840200 | 0.61180000  |



---

|   |             |             |             |
|---|-------------|-------------|-------------|
| C | 3.76904000  | 0.39171200  | 0.94378500  |
| C | 3.15843900  | 0.87812800  | 2.14447500  |
| C | 2.59590800  | 2.17612300  | 2.11003600  |
| C | 1.41556900  | 2.47425500  | 2.85720700  |
| C | 0.68709700  | 3.49124500  | 2.12517400  |
| C | 1.40721200  | 3.78787500  | 0.91313800  |
| C | 0.70862600  | 4.07462700  | -0.26164500 |
| C | 1.16457700  | 3.52779000  | -1.51369200 |
| C | 2.32965200  | 2.71745900  | -1.58153000 |
| C | 2.38442700  | 1.73463900  | -2.63695000 |
| C | 3.19514500  | 0.52708500  | -2.56332300 |
| C | 3.97052300  | 0.24650900  | -1.37873000 |
| C | 3.79509800  | 1.16337000  | -0.27008700 |
| C | 3.06631000  | 2.42964400  | -0.34176800 |
| C | 2.58159600  | 2.95679300  | 0.87292600  |
| C | 0.69985300  | -1.01980200 | 3.95575600  |
| C | 1.42413900  | -2.07500700 | 3.29486700  |
| C | 0.72944300  | -3.10459200 | 2.65519700  |
| C | 1.18556700  | -3.58429400 | 1.37579100  |
| C | 0.01069800  | -3.91603200 | 0.60021400  |
| C | 0.00932800  | -3.77829600 | -0.80650200 |
| C | -1.21049200 | -3.40566800 | -1.44056100 |
| C | -1.21330800 | -2.61125700 | -2.64845900 |
| C | -2.44851500 | -1.86497400 | -2.66722300 |
| C | -2.45173000 | -0.53974400 | -3.20555400 |
| C | -3.20206100 | 0.51060900  | -2.55957100 |
| C | -3.97442500 | 0.22605700  | -1.37371300 |
| C | -3.80219400 | 1.14382600  | -0.26515700 |
| C | -3.76994100 | 0.37218300  | 0.94877000  |
| C | -3.16015100 | 0.86173100  | 2.14863100  |
| C | -2.59716200 | -0.09201700 | 3.02955900  |
| C | -1.41779400 | 0.21597000  | 3.77316700  |
| C | -0.68920300 | -1.02344900 | 3.95671200  |
| C | -1.40876700 | -2.08241500 | 3.29675400  |
| C | -0.70946600 | -3.10828200 | 2.65609500  |
| C | -1.16468600 | -3.59025200 | 1.37724900  |
| C | -2.32885200 | -3.05536200 | 0.76194400  |
| C | -2.38300900 | -3.08590300 | -0.68007600 |
| C | -3.19567800 | -2.17190100 | -1.47090300 |
| C | -3.97168100 | -1.14503700 | -0.81699900 |
| C | -3.79584400 | -1.02796600 | 0.61681500  |
| C | -3.06545800 | -1.98368500 | 1.44858800  |
| C | -2.58155200 | -1.51429200 | 2.68676800  |
| S | -0.00011300 | 0.26423200  | 0.44128800  |

---

|                   |             |             |             |
|-------------------|-------------|-------------|-------------|
| Sc                | 1.89230600  | -0.33363800 | -0.80938400 |
| Sc                | -1.89195100 | -0.33822400 | -0.80787000 |
| 5. Sc2S@C78-24088 |             |             |             |
| C                 | -2.36721600 | 3.08002000  | -1.11397900 |
| C                 | -3.22283400 | 2.05967900  | -1.64285000 |
| C                 | -4.07124300 | 1.25428600  | -0.78380100 |
| C                 | -4.29852800 | 0.00564000  | -1.46063600 |
| C                 | -4.07188300 | -1.24364100 | -0.78433400 |
| C                 | -3.22367600 | -2.04923900 | -1.64398700 |
| C                 | -2.36671900 | -3.06868000 | -1.11499800 |
| C                 | -1.15710300 | -3.31838200 | -1.82175600 |
| C                 | -0.00018000 | -3.81514300 | -1.14640600 |
| C                 | 1.15678500  | -3.31848000 | -1.82174900 |
| C                 | 2.36641700  | -3.06888500 | -1.11498500 |
| C                 | 3.22342700  | -2.04949000 | -1.64394900 |
| C                 | 4.07171600  | -1.24398600 | -0.78431700 |
| C                 | 4.29853300  | 0.00525400  | -1.46063500 |
| C                 | 4.07141900  | 1.25394500  | -0.78381600 |
| C                 | 3.22308100  | 2.05942800  | -1.64288200 |
| C                 | 2.36751400  | 3.07981300  | -1.11398800 |
| C                 | 1.15709400  | 3.32893200  | -1.82012500 |
| C                 | 0.00017700  | 3.82872200  | -1.14566700 |
| C                 | -1.15678200 | 3.32903600  | -1.82012400 |
| C                 | -2.40911900 | 3.30029600  | 0.28520100  |
| C                 | -1.21374000 | 3.73246000  | 0.98622900  |
| C                 | 0.00018000  | 3.98717800  | 0.28217000  |
| C                 | 1.21407600  | 3.73234500  | 0.98622700  |
| C                 | 2.40941600  | 3.30007300  | 0.28519800  |
| C                 | 3.14571600  | 2.40847700  | 1.14851600  |
| C                 | 3.87295400  | 1.28438800  | 0.64889800  |
| C                 | 3.82828200  | 0.00484600  | 1.38860300  |
| C                 | 3.87350200  | -1.27454000 | 0.64860900  |
| C                 | 3.14500000  | -2.39774000 | 1.14744200  |
| C                 | 2.40823200  | -3.28833800 | 0.28411300  |
| C                 | 1.21317600  | -3.71954500 | 0.98496000  |
| C                 | -0.00018400 | -3.97292000 | 0.28066300  |
| C                 | -1.21352200 | -3.71943000 | 0.98495600  |
| C                 | -2.40853700 | -3.28811400 | 0.28410600  |
| C                 | -3.14521800 | -2.39744200 | 1.14743200  |
| C                 | -3.87363400 | -1.27418000 | 0.64859600  |
| C                 | -3.82828800 | 0.00520000  | 1.38860200  |
| C                 | -3.87283200 | 1.28474700  | 0.64890900  |
| C                 | -3.14550800 | 2.40877600  | 1.14852200  |
| C                 | -2.40798500 | 2.32551000  | 2.37866100  |

---

|                   |             |             |             |
|-------------------|-------------|-------------|-------------|
| C                 | -1.20643300 | 3.12472300  | 2.27874200  |
| C                 | 0.00012100  | 2.71739000  | 2.91189500  |
| C                 | 1.20671200  | 3.12461000  | 2.27873800  |
| C                 | 2.40818900  | 2.32528400  | 2.37865500  |
| C                 | 2.41553600  | 1.15151300  | 3.10229300  |
| C                 | 3.14672300  | 0.00468200  | 2.64214400  |
| C                 | 2.41581000  | -1.14239800 | 3.10265800  |
| C                 | 2.40757900  | -2.31476800 | 2.37751000  |
| C                 | 1.20597600  | -3.11362000 | 2.27766500  |
| C                 | -0.00012800 | -2.70830000 | 2.91251000  |
| C                 | -1.20626700 | -3.11350500 | 2.27765900  |
| C                 | -2.40779700 | -2.31454200 | 2.37750100  |
| C                 | -2.41592000 | -1.14217300 | 3.10265300  |
| C                 | -3.14673200 | 0.00497300  | 2.64214300  |
| C                 | -2.41544000 | 1.15173900  | 3.10229500  |
| C                 | -1.20107400 | 0.71547900  | 3.78056200  |
| C                 | 0.00006400  | 1.47142000  | 3.68915500  |
| C                 | 1.20113100  | 0.71536800  | 3.78056400  |
| C                 | 1.20126300  | -0.70681200 | 3.78152000  |
| C                 | -0.00007100 | -1.46282000 | 3.69059900  |
| C                 | -1.20133500 | -0.70670100 | 3.78151900  |
| C                 | -2.81926100 | 1.24548900  | -2.78605700 |
| C                 | -3.52646700 | 0.00566400  | -2.68237100 |
| C                 | -2.81967500 | -1.23491900 | -2.78698900 |
| C                 | -1.44462500 | -1.25793200 | -3.23582300 |
| C                 | -0.70805000 | -2.41624800 | -2.86191300 |
| C                 | 0.70781900  | -2.41631300 | -2.86191400 |
| C                 | 1.44449200  | -1.25805900 | -3.23581100 |
| C                 | 2.81952100  | -1.23514400 | -2.78694500 |
| C                 | 3.52646700  | 0.00535300  | -2.68236800 |
| C                 | 2.81941200  | 1.24526300  | -2.78609300 |
| C                 | 1.44460200  | 1.26757500  | -3.23456700 |
| C                 | 0.70815500  | 2.42587300  | -2.85963200 |
| C                 | -0.70792600 | 2.42594000  | -2.85963600 |
| C                 | -1.44447200 | 1.26770500  | -3.23456200 |
| C                 | -0.73430200 | 0.00497700  | -3.49244900 |
| C                 | 0.73430100  | 0.00491200  | -3.49245000 |
| Sc                | -2.08017200 | -0.00205600 | -0.91471500 |
| Sc                | 2.08019800  | -0.00187300 | -0.91469500 |
| S                 | 0.00001600  | -0.14955000 | 0.25946700  |
| 6. Sc2S@C80-31923 |             |             |             |
| C                 | 0.00002300  | -3.99044600 | -0.97816900 |
| C                 | 1.16930400  | -3.53427600 | -1.66947600 |
| C                 | 2.33960300  | -3.14140100 | -0.95420800 |

---

|   |             |             |             |
|---|-------------|-------------|-------------|
| C | 3.17564300  | -2.11974500 | -1.56605200 |
| C | 4.03142500  | -1.22576100 | -0.80626000 |
| C | 3.89527600  | 0.09653800  | -1.40591000 |
| C | 3.81565500  | 1.32721300  | -0.64243400 |
| C | 3.13247500  | 2.42136500  | -1.25414200 |
| C | 2.41342200  | 3.38396300  | -0.45392000 |
| C | 1.20602900  | 3.79624100  | -1.15695900 |
| C | -0.00007200 | 4.08318800  | -0.45248700 |
| C | -1.20621000 | 3.79620400  | -1.15687600 |
| C | -2.41354600 | 3.38389300  | -0.45375600 |
| C | -3.13262500 | 2.42127400  | -1.25392900 |
| C | -3.81574400 | 1.32710700  | -0.64217700 |
| C | -3.89539800 | 0.09642500  | -1.40565400 |
| C | -4.03147700 | -1.22588400 | -0.80600200 |
| C | -3.17570500 | -2.11984300 | -1.56584200 |
| C | -2.33958200 | -3.14147000 | -0.95405300 |
| C | -1.16931800 | -3.53430800 | -1.66939800 |
| C | 0.00007200  | -4.08520200 | 0.41273000  |
| C | -1.16952200 | -3.72905300 | 1.16106300  |
| C | -2.34473800 | -3.24636100 | 0.50888200  |
| C | -3.19279600 | -2.32745100 | 1.26003400  |
| C | -4.05113500 | -1.33255100 | 0.63268400  |
| C | -3.91096000 | -0.10102100 | 1.40656100  |
| C | -3.82002900 | 1.22549700  | 0.81720100  |
| C | -3.13284200 | 2.22253400  | 1.57293900  |
| C | -2.41368100 | 3.28866900  | 0.91402300  |
| C | -1.20657400 | 3.59898600  | 1.66631100  |
| C | -0.00002100 | 3.98145200  | 1.00873500  |
| C | 1.20658500  | 3.59901800  | 1.66622800  |
| C | 2.41365100  | 3.28873600  | 0.91385800  |
| C | 3.13288500  | 2.22262000  | 1.57272600  |
| C | 3.82005100  | 1.22560400  | 0.81694400  |
| C | 3.91107000  | -0.10091300 | 1.40630200  |
| C | 4.05123600  | -1.33244600 | 0.63242100  |
| C | 3.19297400  | -2.32738400 | 1.25983200  |
| C | 2.34487300  | -3.24630100 | 0.50872700  |
| C | 1.16970500  | -3.72901500 | 1.16098200  |
| C | 0.71358600  | -3.20494400 | 2.43368100  |
| C | -0.71333800 | -3.20496600 | 2.43372800  |
| C | -1.43618700 | -2.16526600 | 3.08632400  |
| C | -2.67159700 | -1.75492500 | 2.48442600  |
| C | -3.11247700 | -0.39742500 | 2.57130200  |
| C | -2.34296700 | 0.59323200  | 3.27216000  |
| C | -2.39006200 | 1.90999600  | 2.75721600  |

|                   |             |             |             |
|-------------------|-------------|-------------|-------------|
| C                 | -1.21162300 | 2.76997900  | 2.81918400  |
| C                 | 0.00008300  | 2.29811700  | 3.39935700  |
| C                 | 1.21173500  | 2.77001400  | 2.81910300  |
| C                 | 2.39019200  | 1.91006400  | 2.75705500  |
| C                 | 2.34316800  | 0.59329900  | 3.27200100  |
| C                 | 3.11265600  | -0.39733800 | 2.57108500  |
| C                 | 2.67181100  | -1.75485300 | 2.48424100  |
| C                 | 1.43644900  | -2.16522600 | 3.08622800  |
| C                 | 0.71655600  | -1.20555200 | 3.84767600  |
| C                 | -0.71626400 | -1.20557200 | 3.84772300  |
| C                 | -1.15668600 | 0.16355000  | 3.93520900  |
| C                 | 0.00012100  | 1.00613900  | 4.00727600  |
| C                 | 1.15694700  | 0.16358400  | 3.93513400  |
| C                 | 2.67502300  | -1.39308600 | -2.71485800 |
| C                 | 3.11611000  | -0.03803900 | -2.61182400 |
| C                 | 2.34283600  | 1.03953400  | -3.16091200 |
| C                 | 2.38887600  | 2.27271800  | -2.46879300 |
| C                 | 1.21116400  | 3.13539200  | -2.41373200 |
| C                 | -0.00014000 | 2.75041500  | -3.05540700 |
| C                 | -1.21141200 | 3.13535900  | -2.41365100 |
| C                 | -2.38910300 | 2.27265300  | -2.46863400 |
| C                 | -2.34307200 | 1.03947100  | -3.16075500 |
| C                 | -3.11627400 | -0.03812500 | -2.61160200 |
| C                 | -2.67515400 | -1.39315800 | -2.71466400 |
| C                 | -1.43886500 | -1.71462700 | -3.36212600 |
| C                 | -0.71271400 | -2.83132300 | -2.85217100 |
| C                 | 0.71260700  | -2.83130300 | -2.85221800 |
| C                 | 1.43869600  | -1.71458800 | -3.36222600 |
| C                 | 0.71609800  | -0.66115500 | -3.98429700 |
| C                 | 1.15520100  | 0.70763100  | -3.87539300 |
| C                 | -0.00014900 | 1.55294100  | -3.83316800 |
| C                 | -1.15547800 | 0.70760100  | -3.87531800 |
| C                 | -0.71634300 | -0.66117500 | -3.98424900 |
| Sc                | 2.03172300  | -0.66492600 | 0.01758100  |
| Sc                | -2.03172200 | -0.66492300 | 0.01752600  |
| S                 | 0.00000300  | 0.52490100  | -0.08192400 |
| 7. Sc2S@C82-39715 |             |             |             |
| C                 | 1.53207100  | -0.28144900 | 3.88627100  |
| C                 | 0.98450800  | 1.04008600  | 3.85492800  |
| C                 | -0.41653100 | 1.24192600  | 3.73580400  |
| C                 | -0.82089700 | 2.42670100  | 3.04613900  |
| C                 | -2.06449200 | 2.51198700  | 2.35763000  |
| C                 | -1.92611100 | 3.46155600  | 1.27674100  |
| C                 | -2.64537100 | 3.23760400  | 0.04715500  |

---

|   |             |             |             |
|---|-------------|-------------|-------------|
| C | -1.93687400 | 3.50561500  | -1.18311600 |
| C | -2.07377000 | 2.56957700  | -2.27727000 |
| C | -0.83217400 | 2.49693200  | -2.96984400 |
| C | -0.43236600 | 1.33192300  | -3.69677000 |
| C | 0.96741500  | 1.13476400  | -3.82790700 |
| C | 1.51513000  | -0.18523000 | -3.89558300 |
| C | 2.74094600  | -0.23206700 | -3.14745900 |
| C | 3.08159600  | -1.37861200 | -2.38562600 |
| C | 3.88791000  | -1.16509200 | -1.19041500 |
| C | 3.86727000  | -2.04825700 | -0.03233200 |
| C | 3.89464800  | -1.19434400 | 1.14769500  |
| C | 3.09215200  | -1.43731600 | 2.34027100  |
| C | 2.75452600  | -0.30997600 | 3.13203300  |
| C | 0.68179600  | -1.37785300 | 3.90015000  |
| C | 1.00663400  | -2.54860300 | 3.13029400  |
| C | 2.17435300  | -2.58740200 | 2.33010200  |
| C | 2.09665300  | -3.38205000 | 1.11894300  |
| C | 2.93865700  | -3.15910800 | -0.04397500 |
| C | 2.09119200  | -3.35236200 | -1.20805600 |
| C | 2.16369000  | -2.52874700 | -2.39982400 |
| C | 0.99311300  | -2.47127900 | -3.19413300 |
| C | 0.66444800  | -1.28087100 | -3.93242400 |
| C | -0.75977000 | -1.08948300 | -3.91589200 |
| C | -1.34416000 | 0.19069100  | -3.71743300 |
| C | -2.63706400 | 0.26571500  | -3.01895000 |
| C | -2.99989300 | 1.47382500  | -2.28017800 |
| C | -3.85618600 | 1.39336600  | -1.14998700 |
| C | -3.60318300 | 2.19246800  | 0.03663900  |
| C | -3.84876400 | 1.36484700  | 1.20360000  |
| C | -2.98851100 | 1.41752100  | 2.33356200  |
| C | -2.62378200 | 0.19066500  | 3.04024800  |
| C | -1.32761600 | 0.09885900  | 3.73046900  |
| C | -0.74283000 | -1.18583600 | 3.89483300  |
| C | -1.30161000 | -2.34766400 | 3.25332300  |
| C | -0.24754500 | -3.14802300 | 2.70070400  |
| C | -0.39353500 | -3.72061200 | 1.41931400  |
| C | 0.81065600  | -3.86446600 | 0.66365400  |
| C | 0.80747800  | -3.84688900 | -0.75937500 |
| C | -0.39978900 | -3.68487200 | -1.50606900 |
| C | -0.25919600 | -3.08107100 | -2.77378300 |
| C | -1.31570100 | -2.26699200 | -3.30102100 |
| C | -2.52629500 | -2.19986000 | -2.65483800 |
| C | -3.23935300 | -0.95218100 | -2.59313400 |
| C | -4.07663500 | -1.01594000 | -1.42323600 |

|    |             |             |             |
|----|-------------|-------------|-------------|
| C  | -4.38136900 | 0.13485600  | -0.71308300 |
| C  | -4.37696800 | 0.11714900  | 0.73832300  |
| C  | -4.07075700 | -1.05067500 | 1.41866300  |
| C  | -3.22796200 | -1.01585000 | 2.58640100  |
| C  | -2.51479800 | -2.26436100 | 2.61375400  |
| C  | -2.73930400 | -2.97604300 | 1.37259200  |
| C  | -1.66581400 | -3.60471700 | 0.69499200  |
| C  | -1.66904300 | -3.58688700 | -0.77363200 |
| C  | -2.74559500 | -2.94197100 | -1.43081400 |
| C  | -3.77431100 | -2.24519100 | -0.71002600 |
| C  | -3.77116800 | -2.26195800 | 0.67372500  |
| C  | 0.11364700  | 3.29624100  | 2.38948300  |
| C  | -0.55405400 | 3.96743000  | 1.28924400  |
| C  | 0.16843300  | 4.24144100  | 0.05339300  |
| C  | -0.56337200 | 4.01548700  | -1.19070400 |
| C  | 0.10299000  | 3.35677500  | -2.30084300 |
| C  | 1.50205300  | 3.04495700  | -2.31221600 |
| C  | 1.92592200  | 1.95725400  | -3.11660900 |
| C  | 3.01349600  | 1.12119900  | -2.69355100 |
| C  | 3.65522200  | 1.34894200  | -1.45431200 |
| C  | 4.07862900  | 0.18826300  | -0.72044000 |
| C  | 4.08174800  | 0.17043000  | 0.71055600  |
| C  | 3.66079400  | 1.31250300  | 1.47472800  |
| C  | 3.02518800  | 1.05427100  | 2.71125700  |
| C  | 1.93988200  | 1.87936100  | 3.16040800  |
| C  | 1.51106000  | 2.98674300  | 2.38506600  |
| C  | 2.23656100  | 3.31697500  | 1.20301700  |
| C  | 1.55123800  | 3.86524900  | 0.04607500  |
| C  | 2.23379200  | 3.34700800  | -1.12709800 |
| C  | 3.30205800  | 2.50902500  | -0.69644100 |
| C  | 3.30375700  | 2.49045100  | 0.74749000  |
| Sc | -0.50623000 | 2.04554700  | -0.01658800 |
| Sc | 1.80498600  | -1.24477100 | -0.01204100 |
| S  | -0.37666100 | -0.29969600 | -0.01164900 |

8. Sc2S@C84-51591

|   |            |             |             |
|---|------------|-------------|-------------|
| C | 1.83186100 | 3.41859700  | 1.71223800  |
| C | 2.47789800 | 2.39254400  | 2.52060500  |
| C | 3.42114400 | 1.48432000  | 1.99292600  |
| C | 3.42104000 | 0.09155400  | 2.48297000  |
| C | 3.85854500 | -0.94796800 | 1.56722400  |
| C | 3.10983500 | -2.18903700 | 1.52407400  |
| C | 3.10979800 | -2.66098200 | 0.18294100  |
| C | 2.06070900 | -3.49693600 | -0.32009800 |
| C | 1.83220800 | -3.41828400 | -1.71237000 |

---

|   |             |             |             |
|---|-------------|-------------|-------------|
| C | 0.51515900  | -3.60704400 | -2.24151400 |
| C | 0.27109200  | -2.64128800 | -3.28395200 |
| C | -0.97668700 | -1.97118600 | -3.39211500 |
| C | -0.97724300 | -0.58805700 | -3.87980700 |
| C | -2.06062900 | 0.31988600  | -3.49698200 |
| C | -1.83231100 | 1.71216200  | -3.41829400 |
| C | -2.47829000 | 2.52054600  | -2.39223000 |
| C | -1.51867800 | 3.50670900  | -1.96643500 |
| C | -1.51832400 | 3.96484200  | -0.66317300 |
| C | -0.27099800 | 4.21527600  | 0.00215900  |
| C | -0.51460500 | 4.00549200  | 1.40774000  |
| C | 0.51484600  | 3.60714100  | 2.24148100  |
| C | 0.27099000  | 2.64138300  | 3.28397200  |
| C | 1.51832100  | 1.96664000  | 3.50674300  |
| C | 1.51811400  | 0.66336600  | 3.96484200  |
| C | 2.47798400  | -0.28617500 | 3.46326100  |
| C | 1.83182100  | -1.59227400 | 3.47556300  |
| C | 2.06063400  | -2.52575600 | 2.43975500  |
| C | 0.97700800  | -3.39210000 | 1.97110400  |
| C | 0.97742400  | -3.87977600 | 0.58797500  |
| C | -0.27041600 | -4.21523200 | -0.00214200 |
| C | -0.51418800 | -4.00552900 | -1.40769600 |
| C | -1.83141000 | -3.47572600 | -1.59234700 |
| C | -2.06026300 | -2.43990600 | -2.52576100 |
| C | -3.10958600 | -1.52437400 | -2.18911300 |
| C | -3.10967600 | -0.18326700 | -2.66107000 |
| C | -3.85847200 | 0.62763600  | -1.72062500 |
| C | -3.42142600 | 1.99282900  | -1.48389400 |
| C | -3.42112400 | 2.48283700  | -0.09112400 |
| C | -2.47804000 | 3.46317100  | 0.28646900  |
| C | -1.83174600 | 3.47550200  | 1.59248700  |
| C | 2.06023600  | 3.49732700  | 0.31994300  |
| C | 0.97681000  | 3.87998000  | -0.58804500 |
| C | 0.97633600  | 3.39227200  | -1.97118000 |
| C | -0.27142800 | 3.28395300  | -2.64131500 |
| C | -0.51535200 | 2.24145800  | -3.60703700 |
| C | 0.51409600  | 1.40777400  | -4.00551900 |
| C | 0.27051100  | 0.00219300  | -4.21522000 |
| C | 1.51788000  | -0.66308600 | -3.96497600 |
| C | 1.51831400  | -1.96637300 | -3.50686700 |
| C | 2.47802900  | -2.39215200 | -2.52078500 |
| C | 3.42120500  | -1.48379500 | -1.99320300 |
| C | 3.85847700  | -1.72053100 | -0.62804400 |
| C | 4.40127100  | -0.68897500 | 0.24246500  |



---

|    |             |             |             |
|----|-------------|-------------|-------------|
| C  | 4.40103800  | 0.68960800  | -0.24279400 |
| C  | 3.85816000  | 1.72106700  | 0.62772700  |
| C  | 3.10934000  | 2.66145900  | -0.18318600 |
| C  | 3.10935600  | 2.18950200  | -1.52429800 |
| C  | 2.06006300  | 2.52605900  | -2.43989300 |
| C  | 1.83130600  | 1.59258500  | -3.47571200 |
| C  | 2.47760500  | 0.28657700  | -3.46342200 |
| C  | 3.42073500  | -0.09101800 | -2.48318100 |
| C  | 3.85815600  | 0.94852800  | -1.56749700 |
| C  | -2.06042400 | 2.43967800  | 2.52596900  |
| C  | -0.97669700 | 1.97109400  | 3.39222700  |
| C  | -0.97701000 | 0.58795300  | 3.87989800  |
| C  | 0.27086400  | -0.00210800 | 4.21522600  |
| C  | 0.51464900  | -1.40765600 | 4.00549100  |
| C  | -0.51470000 | -2.24150700 | 3.60709300  |
| C  | -0.27070800 | -3.28396200 | 2.64132900  |
| C  | -1.51800000 | -3.50691800 | 1.96656700  |
| C  | -1.51771800 | -3.96501700 | 0.66328000  |
| C  | -2.47761000 | -3.46349600 | -0.28626800 |
| C  | -3.42073300 | -2.48326500 | 0.09144900  |
| C  | -3.85830300 | -1.56759900 | -0.94805600 |
| C  | -4.40114100 | -0.24291100 | -0.68906800 |
| C  | -4.40107200 | 0.24233300  | 0.68947200  |
| C  | -3.85843100 | 1.56709400  | 0.94843200  |
| C  | -3.10967300 | 1.52401300  | 2.18945000  |
| C  | -3.10954500 | 0.18288600  | 2.66143200  |
| C  | -2.06034400 | -0.32015000 | 3.49724000  |
| C  | -1.83179400 | -1.71242100 | 3.41852100  |
| C  | -2.47770800 | -2.52086100 | 2.39246800  |
| C  | -3.42098800 | -1.99325900 | 1.48422300  |
| C  | -3.85818200 | -0.62811700 | 1.72096700  |
| S  | 0.00007400  | -0.00037300 | -0.00022700 |
| Sc | 2.31554000  | -0.00006700 | -0.00004300 |
| Sc | -2.31536500 | -0.00015100 | -0.00009400 |

S3 Relative energies of C4- n (energy in kcal/mol) calculated at the B3LYP/3-21G level

| Molecule               | $N_{55}$ | $\Delta E$ | Gap  | Molecule               | $N_{55}$ | $\Delta E$ | Gap  |
|------------------------|----------|------------|------|------------------------|----------|------------|------|
| C <sub>70</sub> :8149  | 0        | 0.0        | 0.99 | C <sub>76</sub> :19151 | 0        | 0.0        | 1.77 |
| C <sub>70</sub> :7852  | 3        | 2.0        | 2.03 | C <sub>76</sub> :19138 | 1        | 16.6       | 0.91 |
| C <sub>70</sub> :7957  | 2        | 2.1        | 1.25 | C <sub>76</sub> :17490 | 2        | 20.1       | 1.33 |
| C <sub>70</sub> :7851  | 3        | 2.3        | 1.57 | C <sub>76</sub> :17459 | 1        | 25.0       | 0.97 |
| C <sub>70</sub> :7892  | 2        | 2.6        | 1.14 | C <sub>76</sub> :17465 | 2        | 28.6       | 1.07 |
| C <sub>70</sub> :7887  | 3        | 3.5        | 1.75 | C <sub>76</sub> :17491 | 2        | 28.9       | 1.50 |
| C <sub>70</sub> :7893  | 3        | 5.7        | 1.58 | C <sub>76</sub> :19142 | 1        | 30.4       | 1.05 |
| C <sub>70</sub> :7854  | 3        | 6.6        | 1.03 | C <sub>76</sub> :17508 | 2        | 30.9       | 1.65 |
| C <sub>70</sub> :7886  | 3        | 7.5        | 1.60 | C <sub>76</sub> :17899 | 2        | 31.7       | 1.31 |
| C <sub>70</sub> :7924  | 2        | 8.6        | 1.24 | C <sub>76</sub> :17418 | 1        | 31.9       | 1.06 |
| C <sub>70</sub> :7846  | 3        | 8.6        | 1.97 | C <sub>76</sub> :17588 | 2        | 32.2       | 1.08 |
| C <sub>70</sub> :7850  | 3        | 10.9       | 1.58 | C <sub>76</sub> :17894 | 1        | 32.3       | 0.86 |
| C <sub>70</sub> :7853  | 3        | 11.5       | 2.17 | C <sub>76</sub> :17464 | 2        | 32.8       | 1.52 |
| C <sub>70</sub> :7921  | 3        | 11.6       | 1.56 | C <sub>76</sub> :18161 | 2        | 32.9       | 0.97 |
| C <sub>70</sub> :7922  | 3        | 11.6       | 1.25 | C <sub>76</sub> :17750 | 1        | 33.4       | 1.03 |
| C <sub>70</sub> :7847  | 3        | 11.7       | 1.36 | C <sub>76</sub> :17492 | 2        | 34.0       | 1.36 |
| C <sub>70</sub> :7960  | 2        | 11.9       | 0.93 | C <sub>76</sub> :17519 | 2        | 34.0       | 1.77 |
| C <sub>70</sub> :8008  | 2        | 13.6       | 1.31 | C <sub>76</sub> :17425 | 2        | 34.7       | 1.45 |
| C <sub>70</sub> :7848  | 3        | 14.1       | 1.58 | C <sub>76</sub> :17512 | 2        | 34.9       | 1.05 |
| C <sub>70</sub> :7888  | 3        | 15.4       | 1.43 | C <sub>76</sub> :18638 | 2        | 35.1       | 1.19 |
| C <sub>70</sub> :8005  | 2        | 15.5       | 0.98 | C1h<br>76:136015       | 2        | 37.3       | 1.36 |
| C <sub>70</sub> :7849  | 3        | 15.5       | 1.03 | C1h 76:54549           | 2        | 37.7       | 1.26 |
| C <sub>70</sub> :7889  | 3        | 15.7       | 1.39 | C1h 76:59553           | 2        | 37.8       | 1.09 |
| C <sub>70</sub> :8064  | 2        | 15.7       | 1.06 | C1h<br>76:726505       | 2        | 39.9       | 1.44 |
| C <sub>70</sub> :7911  | 3        | 15.9       | 1.42 | C1h 76:63537           | 2        | 42.3       | 0.97 |
|                        |          |            |      |                        |          |            |      |
| C <sub>72</sub> :10528 | 2        | 0.0        | 1.50 | C <sub>78</sub> :24109 | 0        | 0.0        | 0.83 |
| C <sub>72</sub> :10611 | 2        | 1.7        | 1.29 | C <sub>78</sub> :24107 | 0        | 8.5        | 1.09 |
| C <sub>72</sub> :10616 | 2        | 3.7        | 1.68 | C <sub>78</sub> :24099 | 1        | 14.4       | 1.53 |
| C <sub>72</sub> :10610 | 2        | 8.3        | 1.36 | C <sub>78</sub> :22595 | 1        | 19.0       | 1.14 |
| C <sub>72</sub> :11188 | 1        | 9.3        | 0.95 | C <sub>78</sub> :21981 | 2        | 22.7       | 1.40 |
| C <sub>72</sub> :10626 | 2        | 14.5       | 1.53 | C <sub>78</sub> :23349 | 1        | 23.6       | 0.99 |
| C <sub>72</sub> :10538 | 2        | 15.1       | 1.25 | C <sub>78</sub> :22010 | 2        | 25.2       | 0.87 |
| C <sub>72</sub> :10482 | 3        | 15.7       | 1.36 | C <sub>78</sub> :22135 | 2        | 25.4       | 1.50 |
| C <sub>72</sub> :10518 | 3        | 16.2       | 1.53 | C <sub>78</sub> :24088 | 2        | 26.0       | 1.05 |
| C <sub>72</sub> :10557 | 2        | 17.0       | 1.29 | C1h 78:83318           | 2        | 26.3       | 1.02 |

|                        |   |      |      |                        |   |      |      |
|------------------------|---|------|------|------------------------|---|------|------|
| C <sub>72</sub> :10612 | 1 | 17.7 | 0.74 | C <sub>78</sub> :21982 | 2 | 26.4 | 1.41 |
| C <sub>72</sub> :10554 | 2 | 18.4 | 1.17 | C <sub>78</sub> :22096 | 2 | 27.5 | 1.73 |
| C <sub>72</sub> :10693 | 2 | 18.6 | 0.98 | C1h 78:83323           | 1 | 27.7 | 1.20 |
| C <sub>72</sub> :10615 | 2 | 19.2 | 1.14 | C1h<br>78:185827       | 2 | 28.3 | 1.20 |
| C1h<br>72:408641       | 3 | 19.5 | 1.41 | C <sub>78</sub> :23295 | 1 | 28.3 | 1.13 |
| C <sub>72</sub> :10530 | 2 | 19.5 | 1.10 | C <sub>78</sub> :21791 | 2 | 29.2 | 1.40 |
| C <sub>72</sub> :10688 | 3 | 19.8 | 1.40 | C <sub>78</sub> :21971 | 2 | 29.8 | 1.29 |
| C <sub>72</sub> :10526 | 3 | 20.7 | 1.49 | C <sub>78</sub> :21983 | 2 | 29.9 | 1.59 |
| C <sub>72</sub> :10689 | 2 | 20.9 | 1.05 | C <sub>78</sub> :22395 | 2 | 30.2 | 1.48 |
| C <sub>72</sub> :11029 | 2 | 21.5 | 1.15 | C <sub>78</sub> :22646 | 2 | 30.5 | 0.77 |
| C <sub>72</sub> :10849 | 2 | 21.8 | 1.07 | C <sub>78</sub> :21769 | 2 | 32.2 | 1.49 |
| C1h<br>72:413844       | 3 | 22.3 | 1.46 | C1h<br>78:185820       | 2 | 32.5 | 1.18 |
| C <sub>72</sub> :10533 | 3 | 22.3 | 1.35 | C1h<br>78:579517       | 2 | 32.8 | 1.42 |
| C <sub>72</sub> :10784 | 2 | 22.5 | 1.03 | C <sub>78</sub> :22598 | 2 | 33.0 | 1.02 |
| C <sub>72</sub> :10779 | 3 | 22.6 | 1.56 | C <sub>78</sub> :23318 | 1 | 33.0 | 1.00 |
|                        |   |      |      |                        |   |      |      |
| C <sub>74</sub> :13333 | 2 | 0.0  | 1.58 | C <sub>80</sub> :31924 | 0 | 0.0  | 0.78 |
| C <sub>74</sub> :14246 | 0 | 4.4  | 0.62 | C <sub>80</sub> :31923 | 0 | 6.1  | 0.52 |
| C <sub>74</sub> :13290 | 2 | 6.1  | 1.53 | C <sub>80</sub> :31922 | 0 | 7.3  | 1.12 |
| C <sub>74</sub> :13295 | 2 | 9.0  | 1.21 | C1h<br>80:112912       | 2 | 28.6 | 1.12 |
| C <sub>74</sub> :13384 | 2 | 10.7 | 1.75 | C <sub>80</sub> :31891 | 1 | 29.0 | 1.01 |
| C <sub>74</sub> :13291 | 2 | 13.5 | 1.22 | C <sub>80</sub> :28324 | 1 | 29.4 | 1.31 |
| C <sub>74</sub> :13334 | 2 | 14.5 | 1.45 | C <sub>80</sub> :31876 | 1 | 29.4 | 1.20 |
| C <sub>74</sub> :13336 | 2 | 16.3 | 1.20 | C <sub>80</sub> :31911 | 1 | 31.8 | 1.31 |
| C <sub>74</sub> :13408 | 2 | 16.4 | 1.13 | C <sub>80</sub> :31920 | 0 | 33.1 | 1.12 |
| C <sub>74</sub> :13549 | 2 | 17.6 | 1.46 | C1h<br>80:112926       | 1 | 33.3 | 1.20 |
| C <sub>74</sub> :13771 | 2 | 17.8 | 1.27 | C <sub>80</sub> :28319 | 1 | 34.8 | 0.91 |
| C <sub>74</sub> :13391 | 2 | 18.1 | 1.15 | C1h<br>80:112916       | 2 | 36.1 | 1.33 |
| C <sub>74</sub> :13335 | 2 | 20.0 | 1.22 | C1h<br>80:112913       | 2 | 37.4 | 0.85 |
| C <sub>74</sub> :13292 | 2 | 20.5 | 0.89 | C <sub>80</sub> :28334 | 2 | 37.5 | 1.71 |
| C <sub>74</sub> :14239 | 2 | 20.9 | 1.01 | C <sub>80</sub> :28863 | 1 | 37.8 | 1.06 |
| C <sub>74</sub> :14239 | 2 | 20.9 | 1.01 | C <sub>80</sub> :29558 | 2 | 38.0 | 1.55 |
| C <sub>74</sub> :14049 | 1 | 21.1 | 0.93 | C <sub>80</sub> :31607 | 1 | 38.4 | 1.47 |
| C <sub>74</sub> :13492 | 3 | 23.5 | 1.36 | C1h                    | 2 | 38.5 | 1.28 |

|                        |   |      |      |                        |   |       |      |
|------------------------|---|------|------|------------------------|---|-------|------|
|                        |   |      |      | 80:249134              |   |       |      |
| C <sub>74</sub> :13393 | 1 | 23.5 | 0.86 | C <sub>80</sub> :28316 | 1 | 39.0  | 1.13 |
| C1h<br>74:100259       | 2 | 24.0 | 1.08 | C <sub>80</sub> :28285 | 2 | 40.0  | 1.47 |
| C <sub>74</sub> :13293 | 2 | 24.2 | 1.20 | C <sub>80</sub> :29097 | 1 | 40.3  | 1.21 |
| C <sub>74</sub> :13410 | 2 | 25.3 | 1.18 | C <sub>80</sub> :28335 | 2 | 40.4  | 1.37 |
| C <sub>74</sub> :13565 | 2 | 27.4 | 1.21 | C <sub>80</sub> :30291 | 1 | 40.7  | 1.01 |
| C <sub>74</sub> :13406 | 2 | 27.9 | 1.30 | C <sub>80</sub> :28871 | 1 | 40.8  | 1.12 |
| C <sub>74</sub> :13825 | 2 | 28.2 | 1.01 | C <sub>80</sub> :29162 | 2 | 41.2  | 1.59 |
|                        |   |      |      |                        |   |       |      |
| C <sub>82</sub> :39717 | 0 | 0.0  | 1.73 | C <sub>84</sub> :51589 | 0 | 0     | 1.03 |
| C <sub>82</sub> :39718 | 0 | 4.2  | 1.06 | C <sub>84</sub> :51591 | 0 | 1.25  | 1.21 |
| C <sub>82</sub> :39715 | 0 | 9.0  | 1.21 | C <sub>84</sub> :51590 | 0 | 3.1   | 1.14 |
| C <sub>82</sub> :39705 | 1 | 20.5 | 1.24 | C <sub>84</sub> :51580 | 0 | 3.99  | 1.17 |
| C <sub>82</sub> :39714 | 0 | 24.3 | 0.81 | C <sub>84</sub> :51578 | 0 | 4.38  | 0.95 |
| C1h<br>82:155199       | 1 | 27.1 | 1.44 | C <sub>84</sub> :51575 | 0 | 7.6   | 1.13 |
| C <sub>82</sub> :39704 | 1 | 28.6 | 1.05 | C <sub>84</sub> :51581 | 0 | 9.21  | 0.95 |
| C1h<br>82:155195       | 1 | 31.5 | 1.11 | C <sub>84</sub> :51383 | 1 | 10.19 | 1.59 |
| C <sub>82</sub> :39686 | 1 | 31.8 | 1.20 | C <sub>84</sub> :51483 | 1 | 12.75 | 1.49 |
| C <sub>82</sub> :39656 | 1 | 31.9 | 1.36 | C <sub>84</sub> :51583 | 0 | 13.78 | 1.08 |
| C <sub>82</sub> :39663 | 1 | 33.4 | 0.85 | C <sub>84</sub> :51573 | 0 | 13.84 | 1.35 |
| C <sub>82</sub> :39712 | 0 | 35.0 | 1.04 | C <sub>84</sub> :51579 | 0 | 14.54 | 1.05 |
| C <sub>82</sub> :39662 | 1 | 36.8 | 1.18 | C <sub>84</sub> :51482 | 1 | 14.91 | 1.06 |
| C1h<br>82:155255       | 1 | 37.2 | 1.33 | C <sub>84</sub> :51577 | 0 | 14.91 | 0.89 |
| C <sub>82</sub> :38471 | 1 | 37.3 | 1.30 | C <sub>84</sub> :51550 | 1 | 15.1  | 1.44 |
| C1h<br>82:155219       | 1 | 37.3 | 1.24 | C <sub>84</sub> :51499 | 1 | 15.15 | 1.16 |
| C1h<br>82:155196       | 1 | 37.8 | 1.28 | C <sub>84</sub> :51365 | 1 | 15.71 | 0.98 |
| C <sub>82</sub> :39716 | 0 | 38.3 | 0.90 | C <sub>84</sub> :51576 | 0 | 16.80 | 0.70 |
| C1h<br>82:155250       | 2 | 38.9 | 1.17 | C <sub>84</sub> :51539 | 1 | 16.94 | 1.14 |
| C <sub>82</sub> :37359 | 1 | 39.0 | 1.26 | C <sub>84</sub> :45206 | 1 | 17.72 | 1.35 |
| C1h<br>82:155182       | 2 | 39.3 | 1.34 | C <sub>84</sub> :51353 | 1 | 18.54 | 1.42 |
| C <sub>82</sub> :35776 | 1 | 39.3 | 1.31 | C <sub>84</sub> :43990 | 1 | 19.09 | 1.33 |
| C1h<br>82:331996       | 2 | 40.7 | 1.50 | C <sub>84</sub> :51397 | 1 | 19.43 | 1.05 |
| C <sub>82</sub> :36531 | 2 | 41.0 | 1.51 | C <sub>84</sub> :51425 | 1 | 19.66 | 1.04 |

---

|                        |   |      |      |                        |   |       |      |
|------------------------|---|------|------|------------------------|---|-------|------|
| C <sub>82</sub> :36652 | 2 | 41.3 | 1.18 | C <sub>84</sub> :51481 | 1 | 19.82 | 1.17 |
|------------------------|---|------|------|------------------------|---|-------|------|
